# Supplementary material
Source: PubMed Central journal article supplement (PMC10160010)
Supplement: NIHMS1891842-supplement-2.pdf [file NIHMS1891842-supplement-2.pdf]

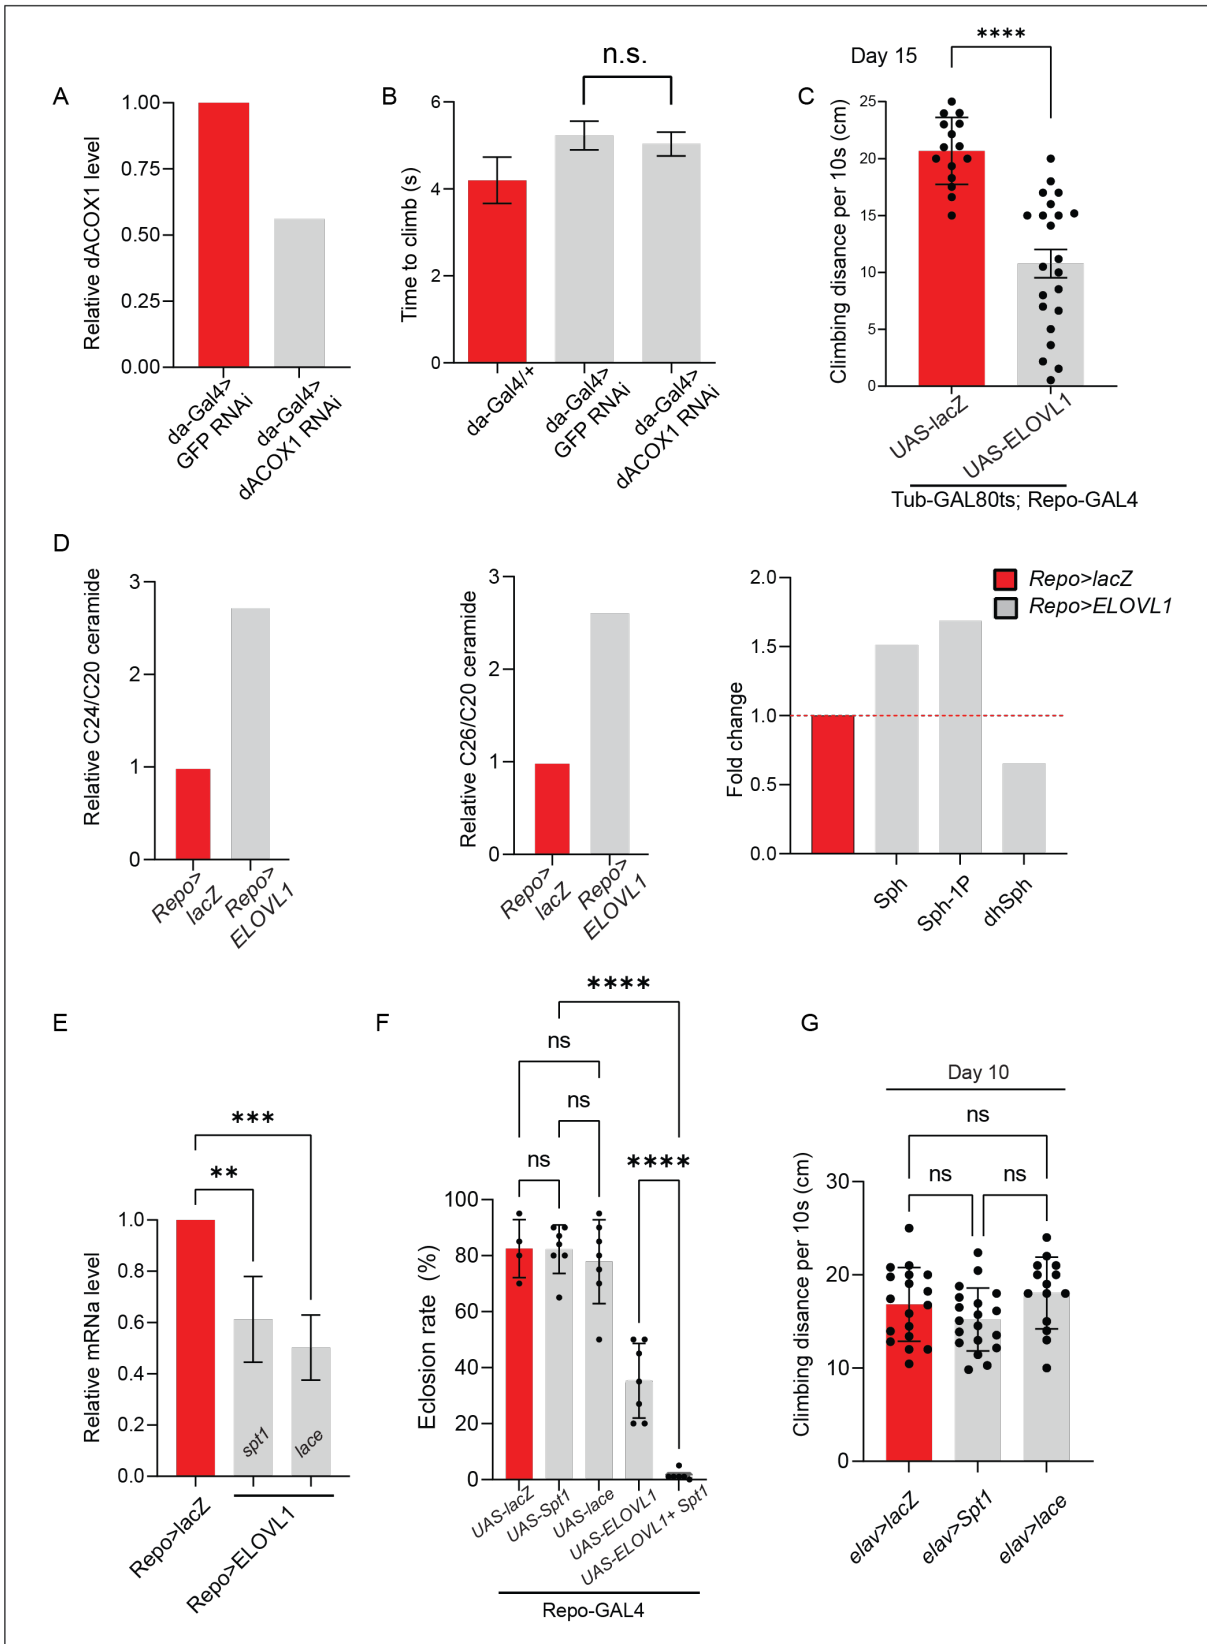

**Figure S1. Glial ELOVL1 expression causes neurodegenerative phenotypes and increases the levels of VL-Ceramides and S1P (Related to Figure 1).**

(A) *dACOX1 RNAi* only reduces the ACOX1 protein levels by less than 50%. (B) Ubiquitous expression of *dACOX1 RNAi* failed to induce climbing defects on Day 20. (n>20 per genotype). (C) Climbing assays on Day 15 for the flies (*Tub-GAL80ts; Repo-GAL4>ELOVL1*). Flies were raised at 18°C (no expression of *ELOVL1*) and shifted to 29°C 1-3 days after eclosion (high expression of *ELOVL1*). (D) Expression of *ELOVL1* in glia results in a 3-fold elevation of VL-Ceramide and a 1.6 fold elevation of Sphingosine phosphates compared to control (*Repo>lacZ*). Note that whole adult heads were used for lipidomic analysis, and glia correspond to less than 10% of the whole-brain population in fly CNS. (E) The transcript level of SPT enzymes (*Lace* and *Spt1*) in control (*Repo>lacZ*) and *Repo>ELOVL1* flies. (F) Eclosion rates of flies that express *UAS-lacZ* (control), *UAS-Spt1*, *UAS-lace*, *UAS-ELOVL1*, or *UAS-ELOVL1+Spt1* in glia. Quantification of the percentage of expected animals per cross (n>4). (G) Climbing assays on Day 10 (*elav>lacZ*, *elav>Spt1*, and *elav>lace*). Eclosion rates were not significantly affected in these flies (n>15 per genotype). Statistical analyses are one-way ANOVA followed by a Tukey post hoc test. Results are mean ± s.e.m. (\*\*\*\*p < 0.0001, \*\*\*p < 0.001, \*\*p < 0.01; n.s., not significant).

Figure S2

A

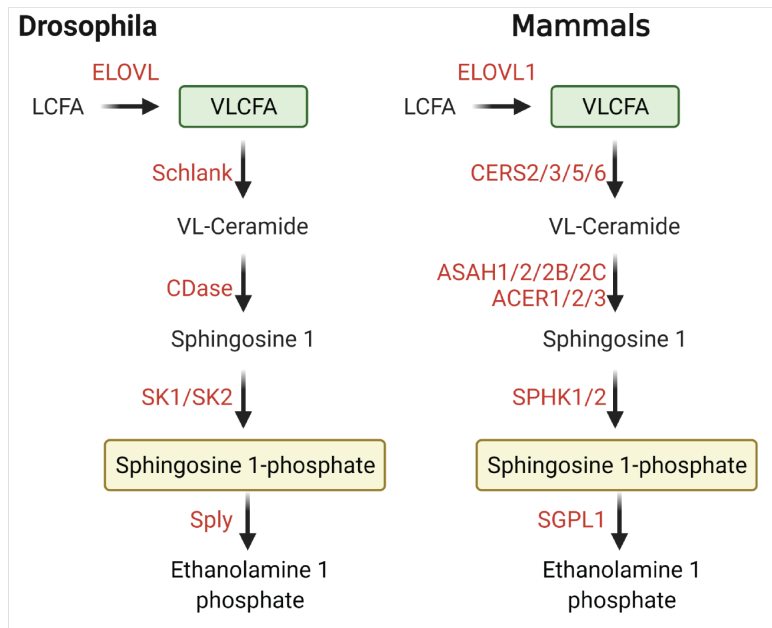

B. Generation of *CDase*<sup>T2A</sup>

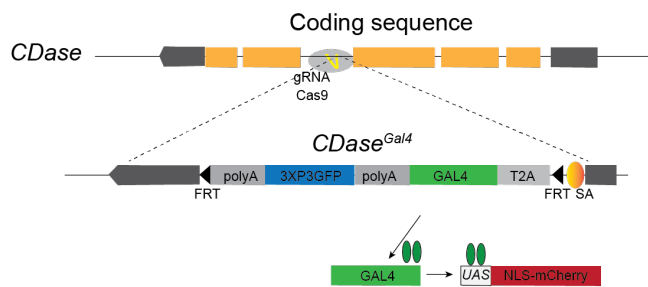

C. Generation of *SK1*<sup>KG4</sup>

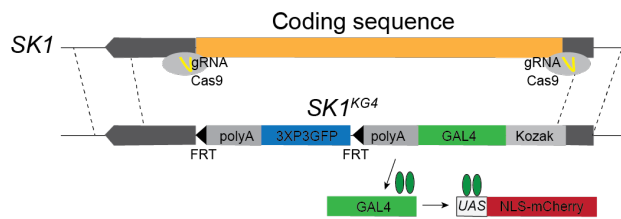

D. Generation of *CDase*<sup>null</sup>

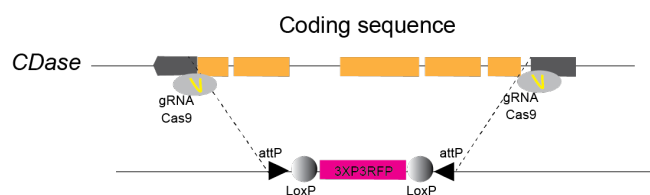

**Figure S2. Strategies to create the *CDase*<sup>T2A</sup>, *SKI*<sup>T2A</sup>, and *CDase*<sup>null</sup> alleles (Related to Figure 2).**

(A) Comparison of the key players implicated in the S1P exit pathway in flies and mammals. Note that mammals have many paralogous enzymes in the S1P exit pathway, whereas the fly S1P exit pathway has few. (B) CRIMIC constructs for *CDase*<sup>T2A</sup>, (C) and *SKI*<sup>T2A</sup>, (D) Generation of the *CDase*<sup>null</sup> allele.

Figure S3

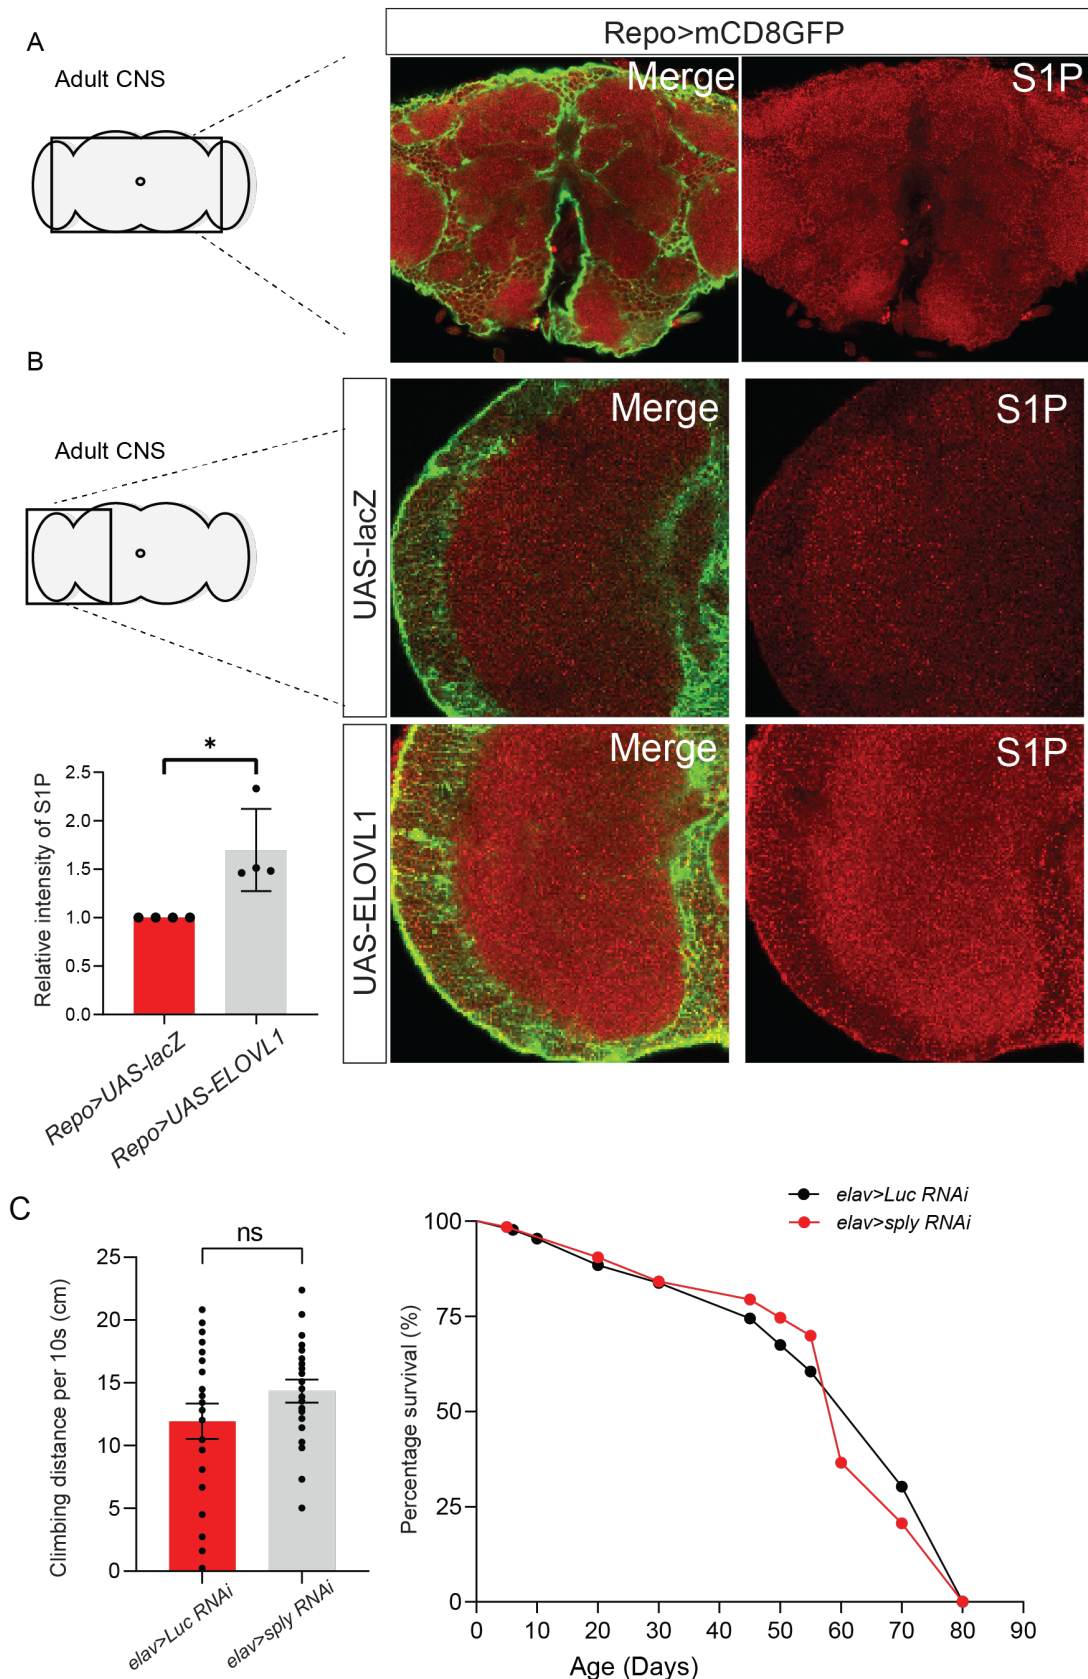

**Figure S3. S1P accumulates in the adult CNS (Related to Figure 3).**

(A) Adult brain. Green marks the glial membrane (*Repo*>*mCD8GFP*), and Red indicates S1P.

(B) Optic lobes. Top: *Repo*>*mCD8GFP*, Bottom: *Repo*>*ELOVLI*. The images were taken as stacks, and a similar section was analyzed for the quantifications (left), n=4 per genotype. (C)

Behavioral phenotypes of flies in which the levels of *sply* in neurons is decreased (*elav*>*sply* *RNAi*). Left: climbing assays, Right: life-span. n>20. Results are mean  $\pm$  s.e.m. (n.s., not significant). Statistical analyses are one-way ANOVA followed by a Tukey post hoc test. Results are mean  $\pm$  s.e.m. (\*p < 0.01; n.s., not significant).

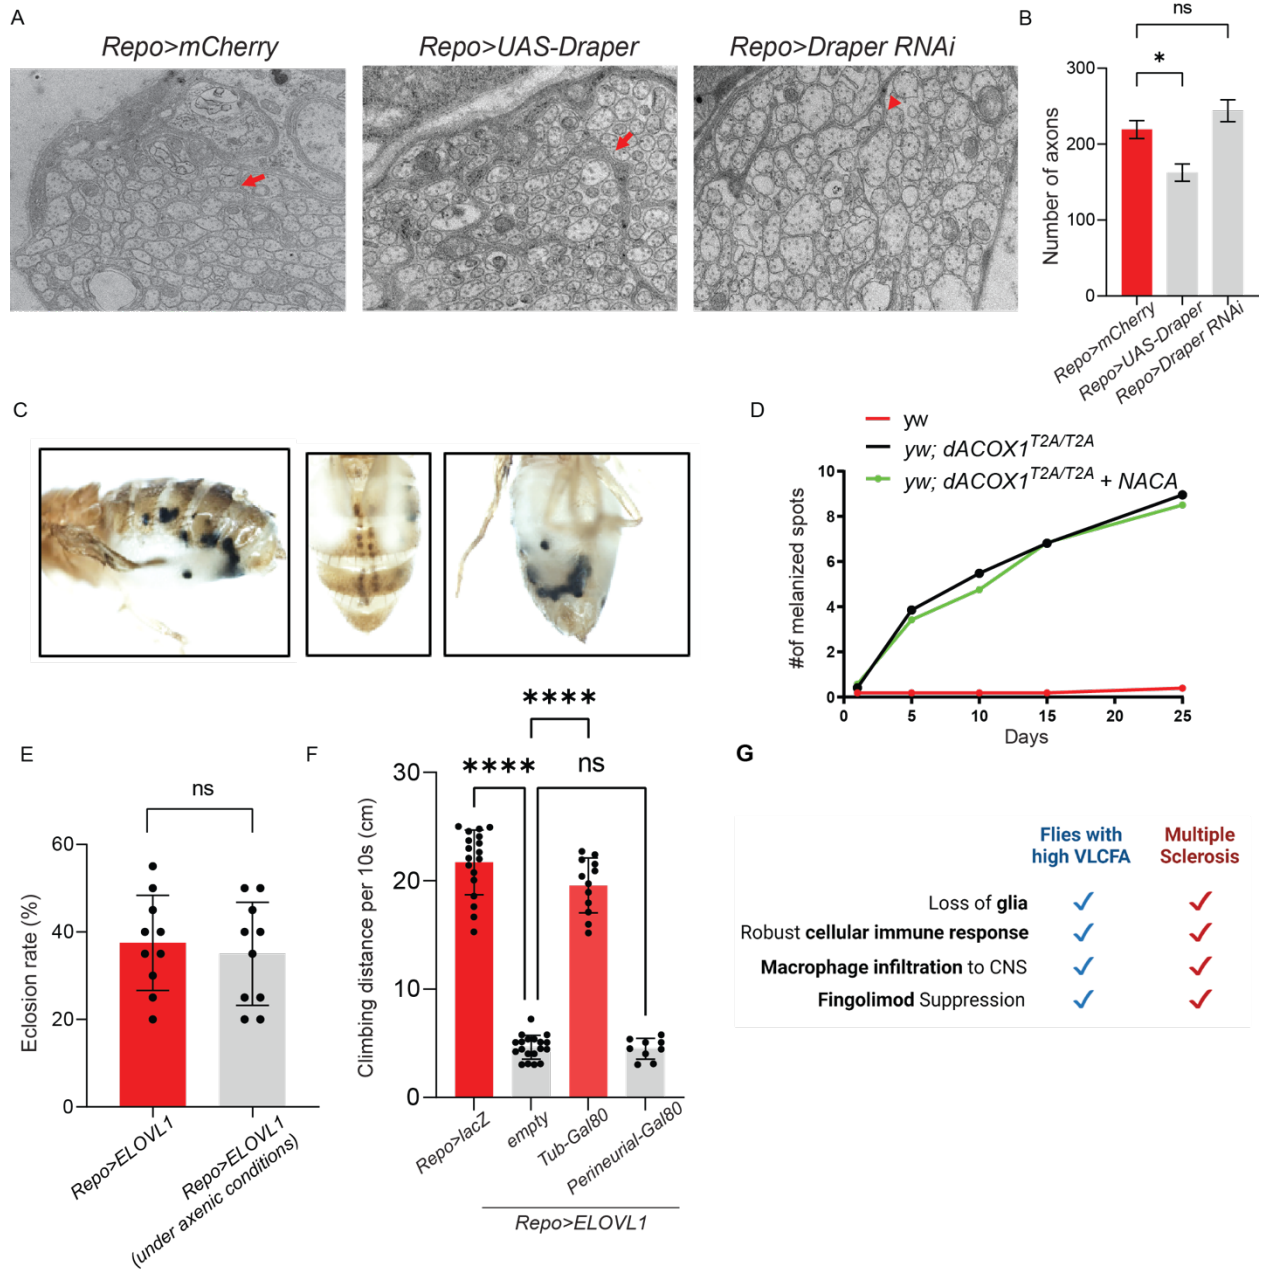

**Figure S4. Progressive melanization phenotypes (Related to Figure 6).**

(A) Image of a section of the wing nerve. Glial Draper expression (*Repo>UAS-Draper*) leads to extended and expanded glial membranes compared to control (*Repo>mCherry*); however, Draper RNAi (*Repo>Draper RNAi*) reduces the size of glial membrane (see red arrows). (B) The number of axons is significantly reduced in the wing margin nerves of *Repo>Draper* flies but not in *Repo>Draper RNAi* flies at Day 3 (n=3 per each genotype). (C) *dACOX1<sup>T2A</sup>* mutants, exhibit robust melanization phenotypes in abdomen, nephrocytes, and fat bodies. (D) Supplementation of NACA (AD4) fails to suppress the melanization phenotypes. (E) Eclosion rate of the *Repo>ELOVL1* flies raised and kept in axenic conditions following the protocol described in Koyle et al., (2016) compared to *Repo>ELOVL1* flies under normal conditions at 25°C. n=10 per genotype. (F) Climbing assays on Day 10 for the flies expressing ubiquitous or perineurial *Gal80* in the background of *Repo>ELOVL1* (genotypes are described in the graph). (G) Summary and comparison of phenotypes of flies with elevated levels of VLCFA in glia (blue) and MS patients (red). Statistical analyses are one-way ANOVA followed by a Tukey post hoc test. Results are mean ± s.e.m. (\*\*\*\*p < 0.0001, \*\*\*p < 0.001, \*\*p < 0.01; n.s., not significant).



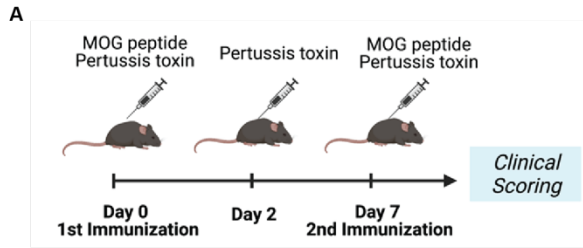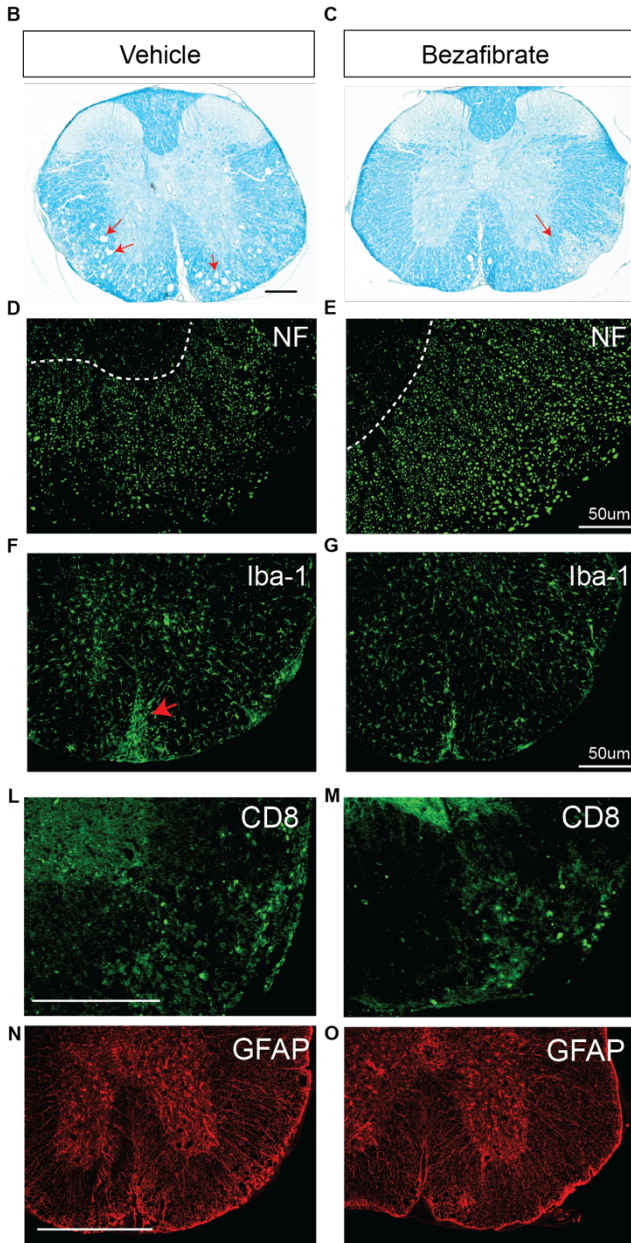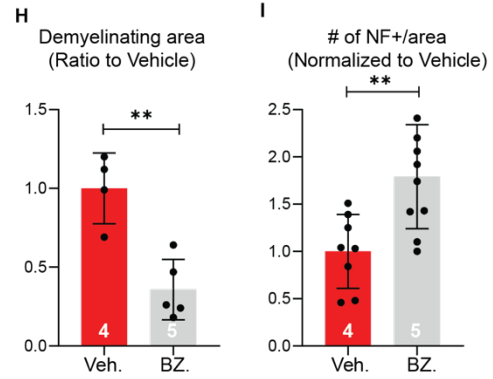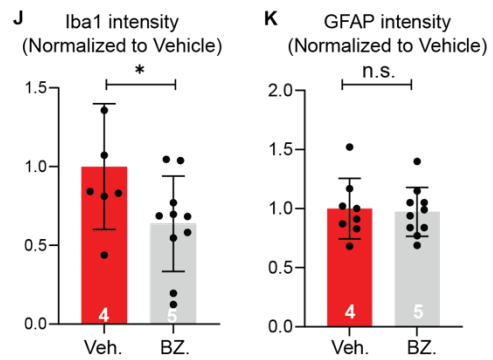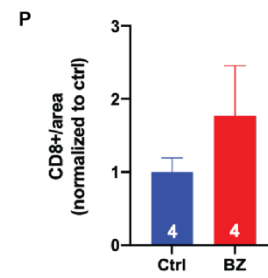

**Figure S5. Prophylactic bezafibrate treatment does not alter the number of CD8+ T cells and reactive astrocytes in EAE mice (Related to Figure 7).**

(A) An overall scheme of EAE induction in mice (B-C) Spinal cord sections from the EAE mice were stained by Luxol fast blue (LFB) to assess the demyelination (n = 4-5 per group). (D-G) Immunostaining of neurofilament (NF) and Iba-1 for neuronal loss and microglia/macrophage infiltration analysis (n = 4-5 per group). (H-K) Quantifications of LFB, NF, IBA1, and GFAP staining. Each data point represents individual images from multiple animals. (L-O) Spinal cord sections from the EAE mice were stained by CD8 and GFAP to assess T cell infiltration and reactive astrocytes (n =4 per group). (P) Quantifications of CD8 positive cells per area. Values were normalized to vehicle-treated control and statistically analyzed by unpaired Student's t-test. Data in all figures are represented as mean  $\pm$  SEM \* p < 0.05, \*\* p < 0.01.

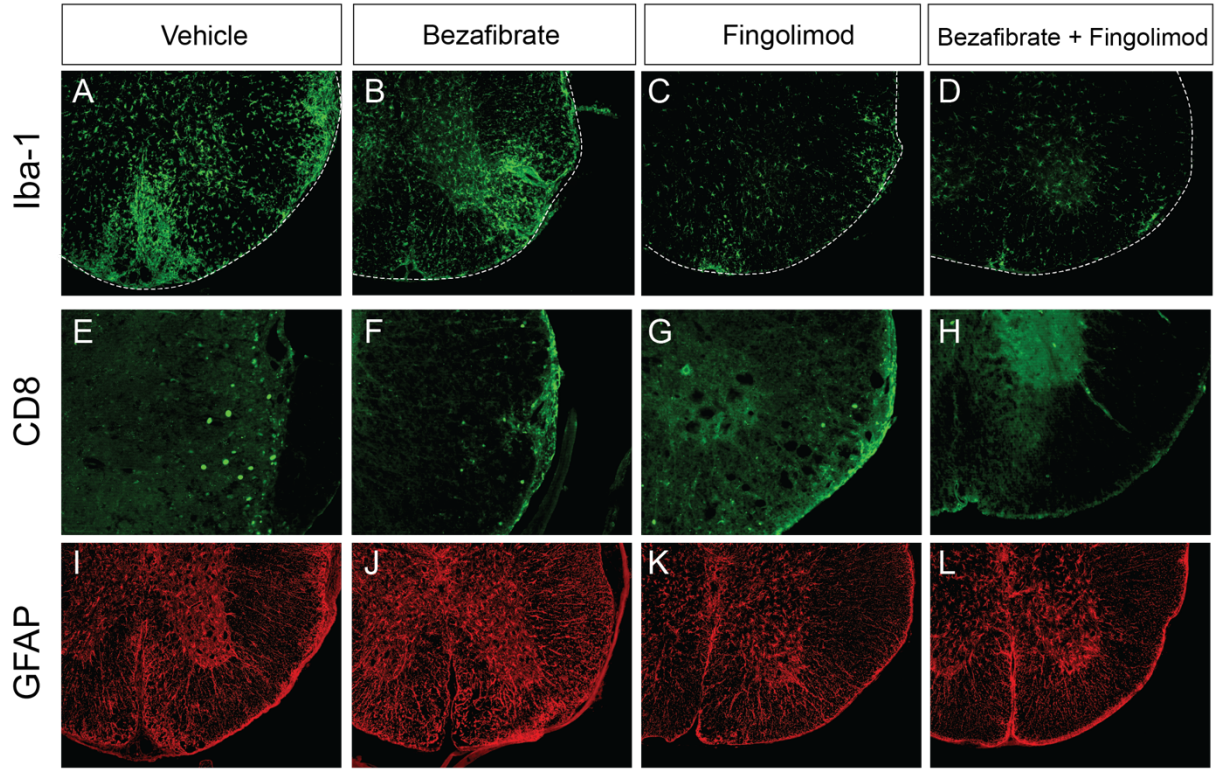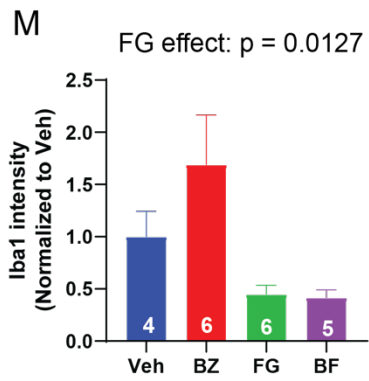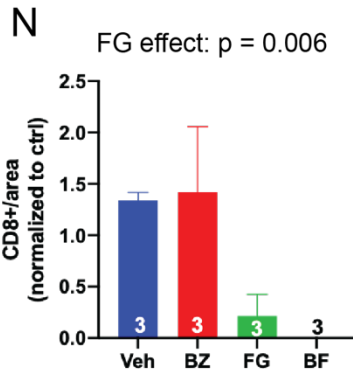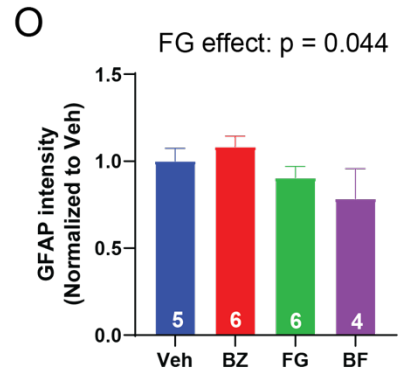

**Figure S6. Fingolimod, but not Bezafibrate, suppresses immune cell infiltration and reactive astrocyte activation in EAE mice (Related to Figure 7).**

(A-L) Spinal cord sections from the EAE mice were stained by Iba1 (microglia/macrophage), CD8 (T cells), and GFAP (reactive astrocytes) (n =3-6 per group). (M-O) Quantifications of CD8. (P) The number of CD4<sup>+</sup> T cells is low at chronic stage of EAE, whereas some CD8<sup>+</sup> T cells remain. Values were normalized to vehicle-treated control and statistically analyzed using two-way ANOVA, followed by Sidak post-hoc analysis, \* p < 0.05, \*\* p < 0.01. Data in all figures are represented as mean ± SEM.
